# Supplementary material for: Effect of visual attention on the properties of optokinetic nystagmus
Source: PLoS One. 2017 Apr 7;12(4):e0175453. doi: 10.1371/journal.pone.0175453 (PMC5384781; doi:10.1371/journal.pone.0175453)
Supplement: S1 Table — (XLSX) [file pone.0175453.s001.xlsx]

## Sheet: Exp.1
	condition	direction	observer											average	overall average
			1	2	3	4	5	6	7	8	9	10	11
Gain	attention	Right	0.215656	0.0220331	0.175472	0.100598	0.0066766	0.264954	0.0176932	0.161686	0	0.314128	0.126856	0.127796	0.134489
		Left	0.127191	0.0527464	0.108384	0.178435	0.02871	0.154621	0.0227	0.221508	0	0.25505	0.058422	0.109797
		Up	0.0944744	0.022033	0.250569	0.116063	0.103822	0.241208	0.134646	0.15757	0.08279	0.306326	0.0123519	0.13835
		Down	0.14633	0	0	0.273578	0.177154	0.252356	0.111166	0.476526	0.0883544	0.256698	0	0.162015
	no-attention	Right	0	0.018027	0	0	0	0.006009	0	0	0	0	0.0213654	0.0041274	0.0087973
		Left	0.0460692	0.0126858	0	0	0	0	0	0.0093472	0	0.00133534	0.008012	0.00704087
		Up	0	0	0	0	0.030045	0.0841272	0	0	0	0	0	0.0103793
		Down	0.059756	0	0.025372	0	0	0	0	0.0649302	0	0	0	0.0136417
	direct	Right	1.04689	1.04716	0.24301	0.968656	0.841368	0.801378	1.14726	1.48331	0.885622	1.0696	0.725242	0.932682	0.822227
		Left	0.729314	1.10752	0.327532	0.741022	0.968284	0.55127	1.08709	0.726774	0.628224	1.1077	1.04635	0.820098
		Up	0.73962	0.69938	0.49254	1.1646	1.20063	0.781262	0.781262	0.77097	0.739276	0.881776	0.468592	0.792719
		Down	0.946138	0.426106	0.518796	1.13088	0.40948	0.914112	0.914112	0.73558	1.09048	0.879498	0.21232	0.743409
Frequency (Hz)	attention	Right	0.404762	0.119048	0.404762	0.166667	0.047619	0.285714	0.047619	0.380952	0	0.547619	0.047619	0.222944	0.251082
		Left	0.261905	0.0952381	0.214286	0.333333	0.0238095	0.309524	0.0238095	0.785714	0	0.238095	0.047619	0.212121
		Up	0.119048	0.0714286	0.52381	0.190476	0.0952381	0.285714	0.190476	0.404762	0.142857	0.714286	0.0952381	0.257576
		Down	0.309524	0	0	0.404762	0.0714286	0.47619	0.047619	1.04762	0.142857	0.928571	0	0.311688
	no-attention	Right	0	0.0238095	0	0	0	0.047619	0	0	0	0	0.0952381	0.0151515	0.0200216
		Left	0.0714286	0.047619	0	0	0	0	0	0.047619	0	0.0238095	0.0238095	0.0194805
		Up	0	0	0	0	0.047619	0.190476	0.047619	0	0	0	0	0.025974
		Down	0.142857	0	0.0238095	0	0	0	0	0.047619	0	0	0	0.0194805
	direct	Right	2.52381	2.2619	1.90476	1.69048	2.97619	2.88095	2.88095	3.40476	2.59524	2.45238	3.28571	2.62338	2.98268
		Left	2.33333	2.42857	0.880952	2.04762	3.38095	2.42857	2.83333	2.7381	2.71429	2.14286	2.97619	2.44589
		Up	3.52381	3.38095	2.83333	3.04762	3.90476	4.09524	4.09524	3.2619	3.19048	2.85714	3.28571	3.40693
		Down	5.19048	3.28571	2.07143	3.30952	4	3.66667	3.66667	3.28571	4.11905	3.21429	2.19048	3.45455
* Gain : slow phase velocity / stimulus velocity
* Each data is the average of five trials for each observer.
* The direction is corresponding to the motion direction of target.

## Sheet: Exp.2
	condition	direction	observer								average	overall average
			1	2	3	4	5	6	7	8
Gain	attention to peripheral	Right	0.353258	0	0.0497422	0.12018	0.247168	0.24304	0.151228	0.162411	0.165878	0.191596
		Left	0.285994	0	0.024704	0.142324	0.21692	0	0.148778	0.0896912	0.113551
		Up	0.370766	0.173194	0.0490744	0.370356	0.274222	0.139639	0.344181	0.458396	0.272479
		Down	0.39459	0.13053	0	0.128191	0.42356	0.325544	0.097346	0.216042	0.214475
	attention to center	Right	0.785958	0	0.030713	0.182306	0.046068	0.297286	0.047071	0.025038	0.176805	0.201208
		Left	0.667054	0	0.014021	0.282802	0.280198	0.261142	0.236956	0.0813456	0.22794
		Up	0.61183	0	0	0.514452	0.116341	0.174038	0.03572	0.0484058	0.187598
		Down	0.502654	0	0	0.176196	0.312358	0.557474	0.151226	0	0.212489
	No attention with peripheral targets	Right	0.0200301	0	0	0.00066766	0	0	0	0.147221	0.0209898	0.0176168
		Left	0.012018	0	0.041396	0.0110166	0	0.0086796	0.0267068	0.0267068	0.0158155
		Up	0	0	0.0476274	0.06343	0.05742	0	0	0	0.0210597
		Down	0.0160242	0	0	0	0.0093474	0.0754468	0	0	0.0126023
	No attention with center targets	Right	0.05742	0	0.049408	0.0227008	0	0.032049	0	0	0.0201972	0.0194042
		Left	0.0026706	0	0.0153564	0.0186948	0	0.132866	0	0.0300452	0.0249541
		Up	0	0	0.0053414	0.0106828	0	0.181606	0	0	0.0247038
		Down	0.0260393	0	0	0	0	0.036054	0	0	0.00776167
	No attention withoutl targets	Right	0.0250376	0	0.012018	0	0.0153564	0	0.0227	0	0.009389	0.0175367
		Left	0	0	0	0	0	0	0	0.008012	0.0010015
		Up	0	0	0	0	0.072776	0.161576	0	0.0133534	0.0309632
		Down	0	0	0	0.16625	0.00066766	0.063428	0	0	0.0287932
Frequency (Hz)	attention to peripheral	Right	0.785714	0	0.0952381	0.142857	0.571429	0.0238095	0.119048	0.309524	0.255952	0.354911
		Left	0.833333	0	0.0238095	0.333333	0.666667	0	0.142857	0.47619	0.309524
		Up	0.880952	0.119048	0.190476	0.309524	0.714286	0.261905	0.214286	0.738095	0.428571
		Down	1.21429	0.119048	0	0.261905	0.857143	0.309524	0.119048	0.52381	0.425595
	attention to center	Right	2.04762	0	0.047619	0.52381	0.0714286	0.880952	0.166667	0.0952381	0.479167	0.400298
		Left	1.69048	0	0.0238095	0.357143	0.238095	0.47619	0.285714	0.214286	0.410714
		Up	1.07143	0	0	0.833333	0.190476	0.119048	0.047619	0.0714286	0.291667
		Down	1.40476	0	0	0.357143	0.404762	1.02381	0.166667	0	0.419643
	No attention with peripheral targets	Right	0.047619	0	0	0.0238095	0	0	0	0.0714286	0.0178571	0.0230655
		Left	0.0238095	0	0.0238095	0.047619	0	0.0238095	0.047619	0.047619	0.0267857
		Up	0	0	0.166667	0.047619	0.0238095	0	0	0	0.0297619
		Down	0.047619	0	0	0	0.0238095	0.0714286	0	0	0.0178571
	No attention with center targets	Right	0.0714286	0	0.0238095	0.047619	0	0.047619	0	0	0.0238095	0.0215774
		Left	0.0238095	0	0.0714286	0.0238095	0	0.0714286	0	0.0714286	0.0327381
		Up	0	0	0.0238095	0.0238095	0	0.0952381	0	0	0.0178571
		Down	0.047619	0	0	0	0	0.047619	0	0	0.0119048
	No attention withoutl targets	Right	0.0714286	0	0.047619	0	0.0238095	0	0.0238095	0.0238095	0.0238095	0.0186012
		Left	0	0	0	0	0	0	0	0.047619	0.00595238
		Up	0	0	0	0	0.0238095	0.0714286	0	0.047619	0.0178571
		Down	0	0	0	0.119048	0.0238095	0.0714286	0	0	0.0267857
* Gain : slow phase velocity / stimulus velocity
* Each data is the average of five trials for each observer.
* The direction is corresponding to the motion direction of target.
